# Supplementary material for: Associations between toenail arsenic concentration and dietary factors in a New Hampshire population
Source: Nutr J. 2012 Jun 29;11:45. doi: 10.1186/1475-2891-11-45 (PMC3426470; doi:10.1186/1475-2891-11-45)
Supplement: Additional file 3 — Dietary factors significantly associated (bold) with toenail arsenic with and without adjustment for seafood consumption. This table provides a comparison of our presented results with results that also included adjustment for total seafood consumption. [file 1475-2891-11-45-S3.pdf]

**Additional File 3. Quartiles of consumption of significant dietary factors.**

| <b>Dietary Factor</b>                                                              | <b>Minimum</b> | <b>Q1</b> | <b>Median</b> | <b>Q3</b> | <b>Maximum</b> |
|------------------------------------------------------------------------------------|----------------|-----------|---------------|-----------|----------------|
| Total Fat (g)                                                                      | 13.37          | 48.37     | 64.665        | 85.505    | 218.01         |
| Animal Fat (g)                                                                     | 1.87           | 24.675    | 34.895        | 47.84     | 142.41         |
| Vegetable Fat (g)                                                                  | 3.25           | 19.88     | 28.705        | 39.85     | 144.8          |
| Total Monounsaturated Fat (g)                                                      | 4.94           | 17.965    | 24.35         | 32.96     | 83.43          |
| Palmitoleic Fatty Acid (g)                                                         | 0.14           | 0.94      | 1.32          | 1.79      | 4.6            |
| Oleic Fatty Acid (g)                                                               | 4.47           | 16.28     | 22.015        | 29.455    | 77.85          |
| Total Polyunsaturated Fat (g)                                                      | 1.83           | 8.86      | 11.825        | 15.535    | 43.68          |
| n-6 Fatty Acids no gamma-linolenic acid (g)                                        | 1.11           | 7.635     | 10.42         | 14.1      | 45.94          |
| Linoleic Fatty Acid (g)                                                            | 1.47           | 7.34      | 9.94          | 13.26     | 38.8           |
| Linolenic Fatty Acid (g)                                                           | 0.18           | 0.89      | 1.18          | 1.55      | 4.36           |
| Arachadonic Fatty Acid (g)                                                         | 0              | 0.09      | 0.13          | 0.17      | 0.49           |
| Total Saturated Fat (g)                                                            | 4.21           | 16.335    | 22.29         | 30.225    | 92.82          |
| Lauric Fatty Acid (g)                                                              | 0.07           | 0.3       | 0.44          | 0.65      | 2.93           |
| Palmitic Fatty Acid (g)                                                            | 2.42           | 9.205     | 12.46         | 16.59     | 47.2           |
| Stearic Fatty Acid (g)                                                             | 0.98           | 4.22      | 5.685         | 7.93      | 22.1           |
| Cholesterol (mg)                                                                   | 17.67          | 183.77    | 249.175       | 324.63    | 1082.98        |
| Animal Protein (g)                                                                 | 2.53           | 41.72     | 54.23         | 69        | 142.02         |
| Retinol <sup>a</sup> (IU)                                                          | 64.22          | 832.92    | 1365.685      | 2120.955  | 28778.68       |
| Vitamin B12 <sup>a</sup> (µg)                                                      | 0.28           | 3.95      | 5.62          | 7.845     | 92.02          |
| Beta Cryptoxanthin (µg)                                                            | 0              | 49.115    | 124.32        | 221.205   | 1139.94        |
| n-3 Fatty Acids (EPA <sup>b</sup> , DHA <sup>c</sup> , DPA <sup>d</sup> ) (g)      | 0              | 0.11      | 0.235         | 0.36      | 2.49           |
| n-3 Fatty Acids (EPA <sup>b</sup> & DHA <sup>d</sup> ) no alpha-linolenic acid (g) | 0              | 0.1       | 0.22          | 0.33      | 2.35           |
| EPA <sup>b</sup> (g)                                                               | 0              | 0.02      | 0.07          | 0.11      | 0.87           |
| DPA <sup>d</sup> (g)                                                               | 0              | 0.01      | 0.02          | 0.03      | 0.14           |
| Manganese <sup>a</sup> (mg)                                                        | 0.57           | 3.315     | 6.165         | 21.59     | 56.98          |
| Ethanol (g)                                                                        | 0              | 0         | 1.79          | 12.16     | 127.18         |

<sup>a</sup> without supplements

<sup>b</sup> Eicosapentaenoic Fatty Acid

<sup>c</sup> Docosapentaenoic Fatty Acid

<sup>d</sup> Docosahexaenoic Fatty Acid
